# Supplementary material
Source: Royal Society of Chemistry journal article supplement (doi:10.1039/d6dt01158f)
Supplement: d6dt01158f1.pdf [file d6dt01158f1.pdf]

## Electronic Supplementary Information (ESI)

### **Metal oxide hollow heterojunctions derived from bimetal-organic frameworks for efficient urea photosynthesis**

Shanshan Xiao<sup>1\*</sup>, Boda Li<sup>2\*</sup>, Zhiheng Liang<sup>2</sup>, Wen Zheng<sup>1</sup> and Wenyu Yuan<sup>2\*</sup>

<sup>1</sup> School of Aeronautical Materials and New Energy, Xihang University, Xi'an, Shaanxi, 710077, China.

<sup>2</sup> Key Laboratory of Applied Surface and Colloid Chemistry, Ministry of Education, School of Chemistry & Chemical Engineering, Shaanxi Normal University, Xi'an, Shaanxi, 710062, China

\* Email: xiaoshanshan@xaau.edu.cn; wenyu.yuan@snnu.edu.cn

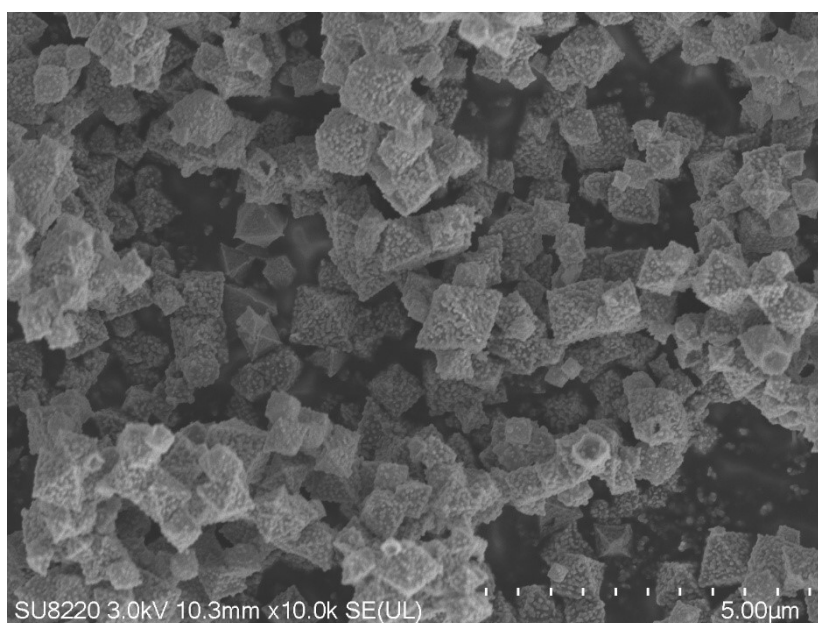

**Fig. S1.** SEM of TMO-7

**eZAF Smart Quant Results**

| Element | Weight % | Atomic % | Net Int. | Error % | Kratio | Z    | R    | A    | F    |
|---------|----------|----------|----------|---------|--------|------|------|------|------|
| OK      | 89.28    | 96.39    | 769.5    | 5.09    | 0.50   | 1.01 | 0.98 | 0.55 | 1.00 |
| TiK     | 5.23     | 1.89     | 1510.2   | 3.80    | 0.06   | 0.90 | 1.10 | 1.33 | 1.02 |
| MnK     | 5.49     | 1.73     | 1845     | 2.53    | 0.06   | 0.90 | 1.12 | 1.21 | 1.00 |

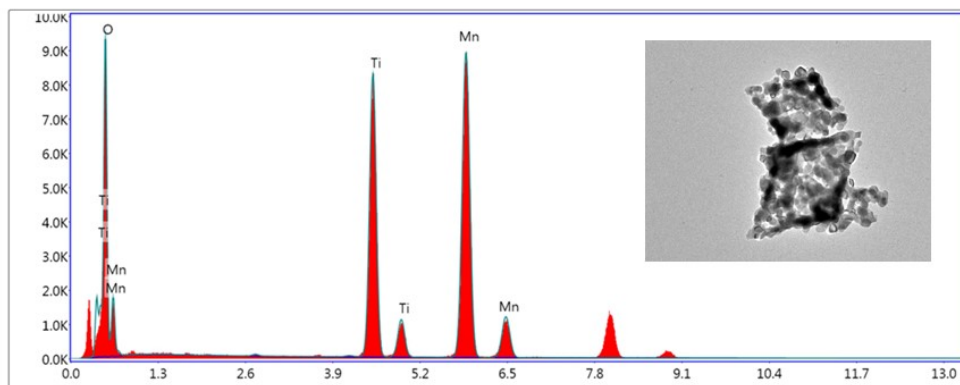

Lsec: 66.0 0 Cnts 0.000 keV Det: Apollo XLT2 SUTW Det

**Fig. S2.** TEM and EDX of TMO-8

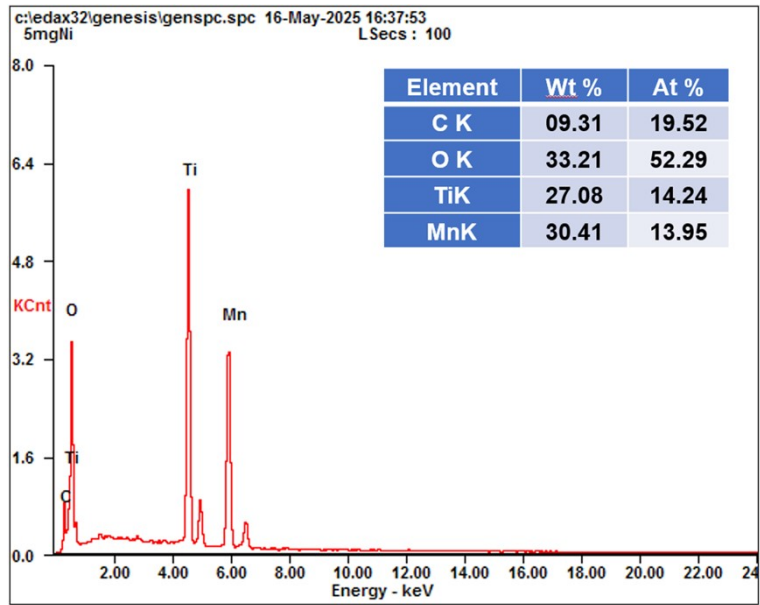

**Fig. S3.** EDX of TMO-7

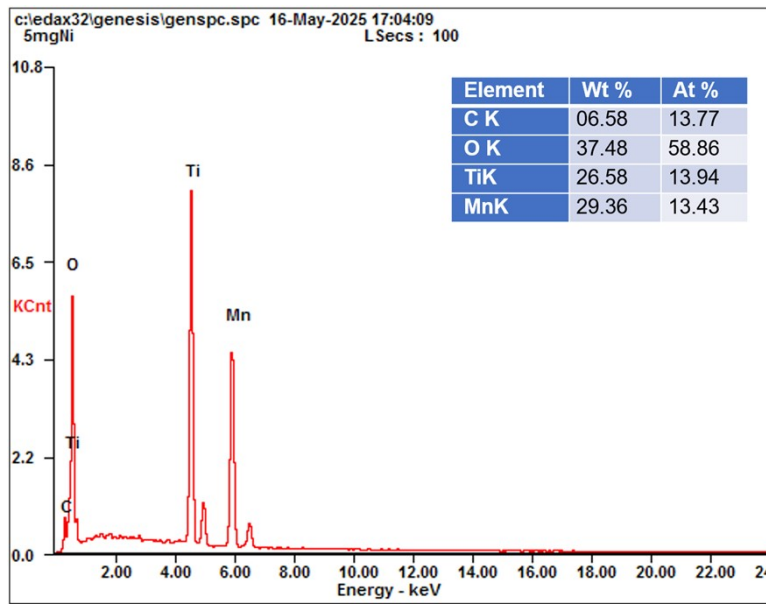

**Fig. S4** EDX of TMO-8

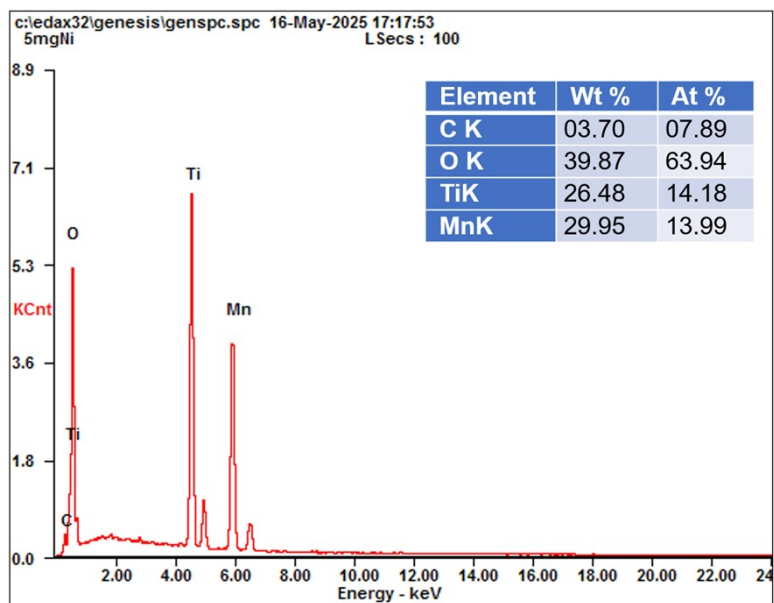

Fig. S5. EDX of TMO-9

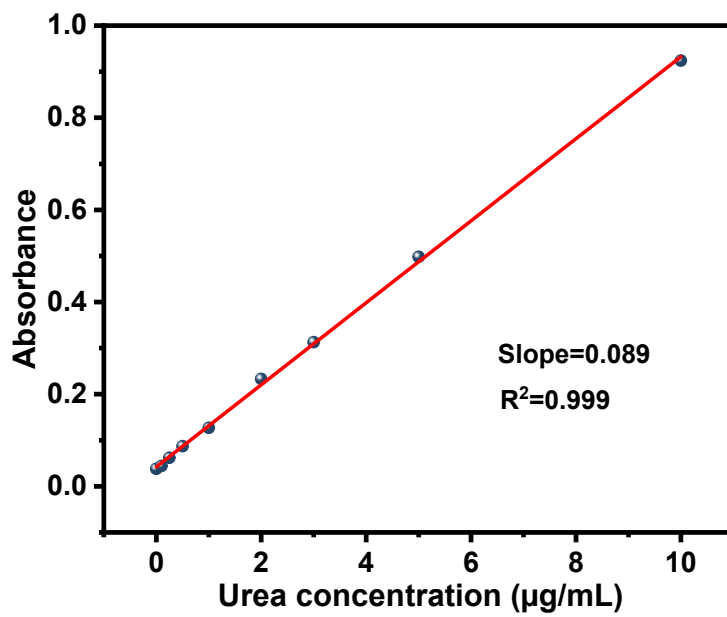

Fig.S6. standard curve for urea quantitative analysis.

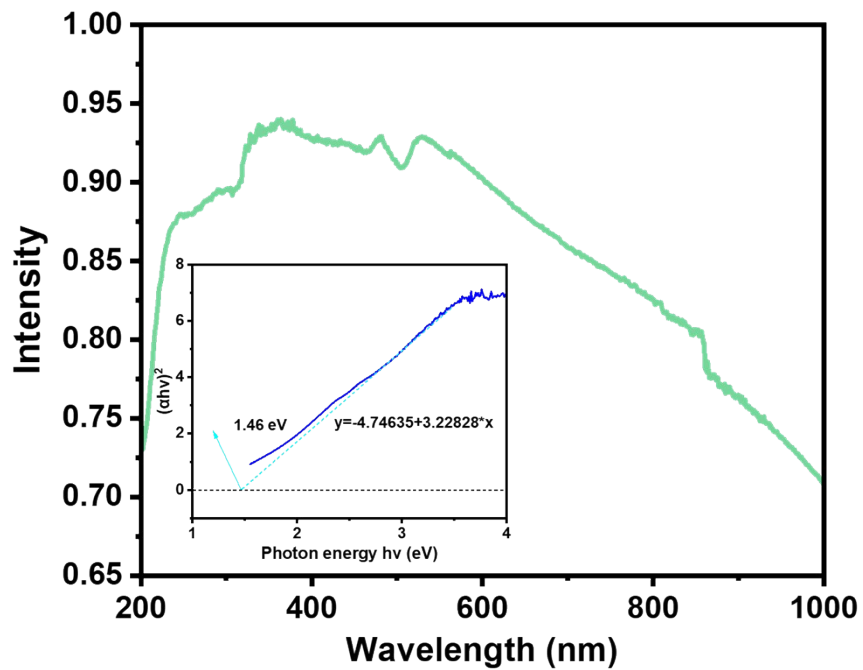

Fig. S7. The light absorbance and band gap.

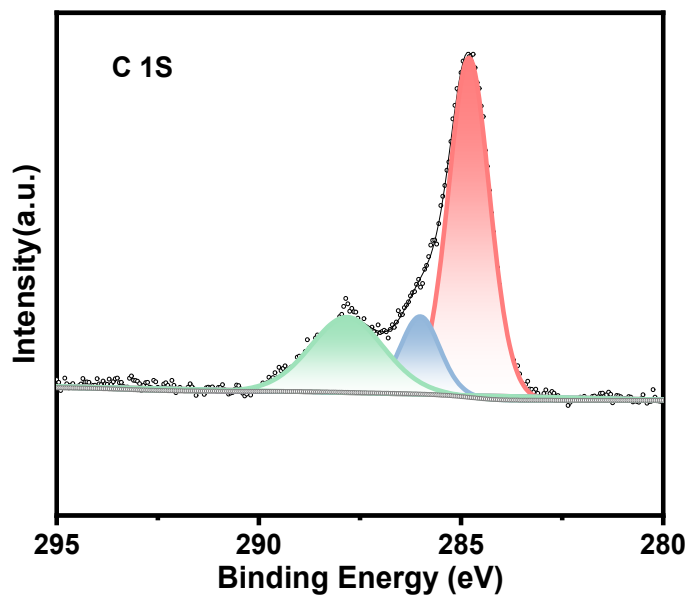

Fig. S8. C1S X-ray photoelectron spectroscopy for the TMO-8 after cycling tests.

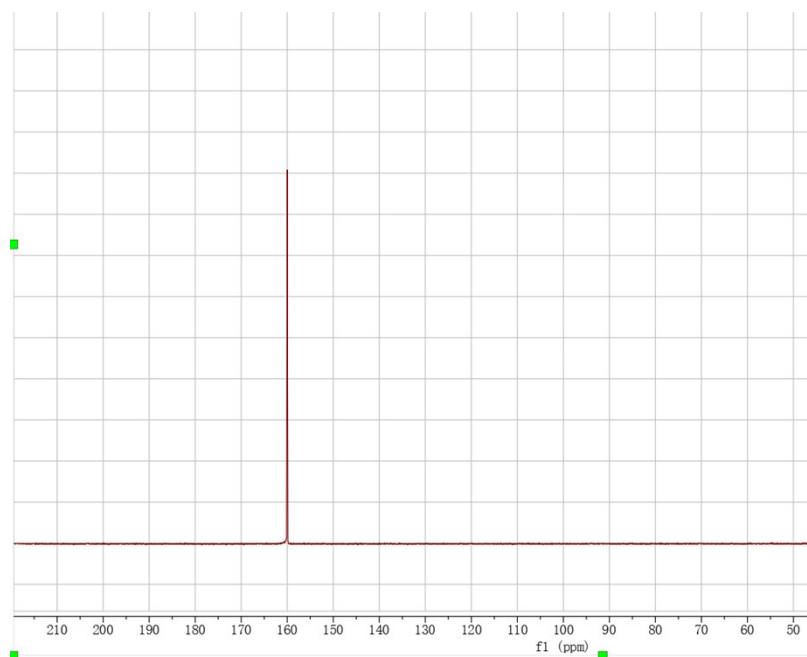

**Fig. S9.**  $^{13}\text{C}$  urea standard sample.

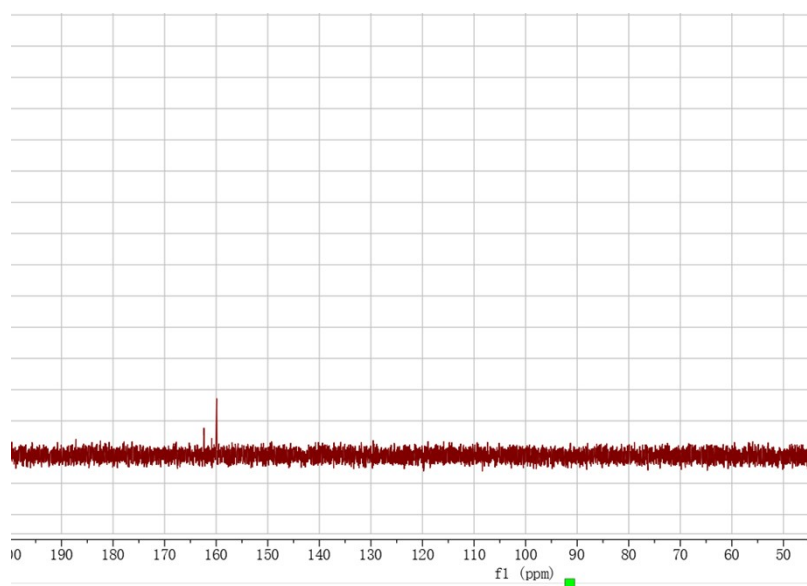

**Fig. S10.**  $^{13}\text{C}$  urea measurement of the sample.

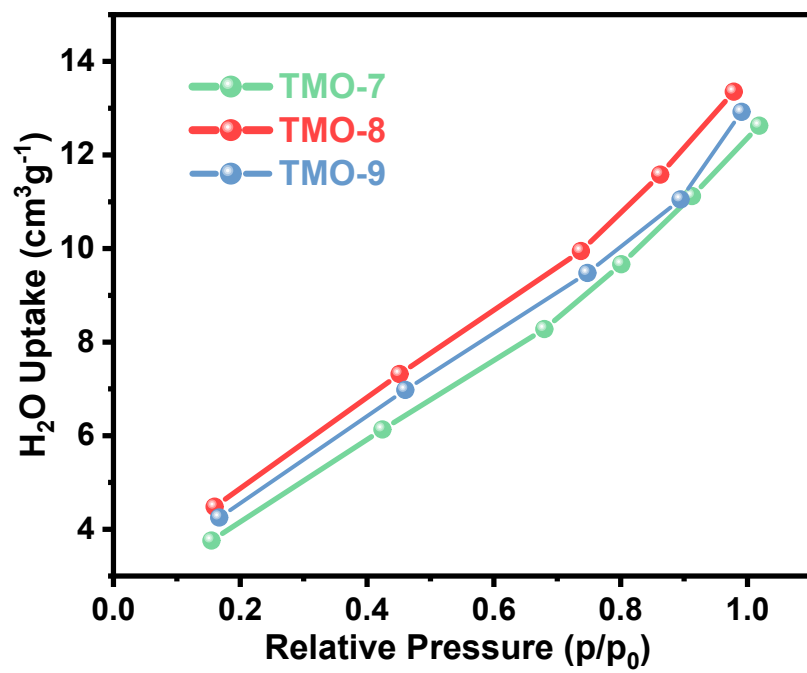

Fig. S11. H<sub>2</sub>O gas adsorption–desorption isotherms at 298 K for TMO-x

**Table S1.** Comparison of photocatalytic urea synthesis performance over TMO-8 with recently reported representative photocatalysts.

| Photocatalysts                                          | Light source                                    | Catalyst loading       | Urea production                            | Selectivity | N source                     | References |
|---------------------------------------------------------|-------------------------------------------------|------------------------|--------------------------------------------|-------------|------------------------------|------------|
| TiO <sub>2</sub> /Mn <sub>2</sub> O <sub>3</sub>        | 300 W Xe lamp                                   | 0.17 mg/mL             | 93 μmol g <sup>-1</sup> h <sup>-1</sup>    | 100%        | NH <sub>3</sub>              | This work  |
| Ru-TiO <sub>2</sub>                                     | 420 nm monochromatic light                      | -                      | 24.95 μmol h <sup>-1</sup> g <sup>-1</sup> | -           | N <sub>2</sub>               | 1          |
| Cs <sub>2</sub> CuBr <sub>4</sub> /TiO <sub>x</sub> -Ar | LED lamp (95.34 mW cm <sup>-2</sup> )<br>365 nm | -                      | ~0.17 μg h <sup>-1</sup> L <sup>-1</sup>   | 88.45%      | NO <sub>3</sub> <sup>-</sup> | 2          |
| Cu SA-TiO <sub>2</sub>                                  | monochromatic light                             | -                      | 432.12 μg g <sup>-1</sup>                  | -           | N <sub>2</sub>               | 3          |
| CeO <sub>2</sub> -500                                   | 300 W Xe lamp                                   | -                      | 15.5 μg h <sup>-1</sup>                    | -           | N <sub>2</sub>               | 4          |
| SrTiO <sub>3</sub> -FeS-CoWO <sub>4</sub>               | 300 W Xe lamp with 420 nm filter                | 80 mg/mL<br>-400 mg/mL | 8054.2 μg h <sup>-1</sup> g <sup>-1</sup>  | -           | N <sub>2</sub>               | 5          |
| Ni <sub>1</sub> -CdS/WO <sub>3</sub>                    | 300 W Xe lamp                                   | -                      | 78 μM h <sup>-1</sup>                      | -           | N <sub>2</sub>               | 6          |
| Pd-CeO <sub>2</sub>                                     | 300 W Xe lamp                                   | -                      | 9.2 μmol h <sup>-1</sup> g <sup>-1</sup>   | -           | N <sub>2</sub>               | 7          |
| SiW <sub>6</sub> Mo <sub>6</sub> @MIL-101(Cr)           | 300 W Xe lamp                                   | -                      | 1148 mg h <sup>-1</sup> g <sup>-1</sup>    | 100%        | N <sub>2</sub>               | 8          |
| Ti <sup>3+</sup> -TiO <sub>2</sub> /Fe-CNTs             | 300 W Hg lamp                                   | -                      | 710 μmol L <sup>-1</sup> g <sup>-1</sup>   | -           | N <sub>2</sub>               | 9          |
| NCP/ZIS                                                 | 300 W Xe lamp                                   | -                      | 19.6 μmol g <sup>-1</sup> h <sup>-1</sup>  | -           | N <sub>2</sub>               | 10         |

## References

1. C. Shi, K. Xia, L. Zhang, M. Guo, X. Guan, C. Gu, X. Yang, Y. Wang, X. Liu and X. Ding, *Adv. Energy Mater.*, 2024, **14**, 2400201.
2. H. Sun, Z. Lin, R. Tang, Y. Liang, S. Zou, X. Zhang, K. Chen, R. Zheng and J. Huang, *Appl. Catal., B: Environ. Energy*, 2025, **360**, 124511.
3. D. Li, Y. Zhao, Y. Miao, C. Zhou, L.-P. Zhang, L.-Z. Wu and T. Zhang, *Adv. Mater.*, 2022, **34**, 2207793.
4. S. Yang, W. Zhang, G. Pan, J. Chen, J. Deng, K. Chen, X. Xie, D. Han, M. Dai and L. Niu, *Angew. Chem., Int. Ed.*, 2023, **62**, e202312076.
5. M. I. Ahmad, Y. Liu, Y. Wang, P. Cao, H. Yu, H. Li, S. Chen and X. Quan, *Angew. Chem., Int. Ed.*, 2025, **64**, e202419628.
6. Y. Zhang, Y. Sun, Q. Wang, Z. Zhuang, Z. Ma, L. Liu, G. Wang, D. Wang and X. Zheng, *Angew. Chem., Int. Ed.*, 2024, **63**, e202405637.
7. S. Yang, J. Deng, J. Chen, Q. Tan, T. Liu, K. Chen, D. Han, Y. Ma, M. Dai and L. Niu, *Catal. Sci. Technol.*, 2023, **13**, 1855–1865.
8. S. Su, X. Li, W. Ding, Y. Cao, S. Yuan, Z. Liu, Y. Yang, Y. Ding and M. Luo, *J. Mater. Chem. A*, 2024, **12**, 15300–15310.
9. H. Maimaiti, B. Xu, J.-y. Sun and L.-r. Feng, *ACS Sustainable Chem. Eng.*, 2021, **9**, 6991–7002.
10. H. Liang, X. Song, Y. Zhang, Y. Wu, B. Zhao, Y. Liu, Y. Jin, L. Sheng, M. Zhao, J. Liu and Z. Li, *J. Alloys Compd.*, 2023, **934**, 167884.
